# Supplementary material for: Intranasal delivery of mitochondrial protein humanin rescues cell death and promotes mitochondrial function in Parkinson's disease
Source: PubMed Central journal article supplement (PMC10283052; doi:10.7150/thno.84165), 2023-05-29
Supplement: thnov13p3330s1.pdf [file thnov13p3330s1.pdf]

**Intranasal delivery of mitochondrial protein humanin rescues cell death and promotes mitochondrial function in Parkinson's disease**

Kyung Hwa Kim

**Supplementary figures and tables**

**Table S1. General characteristics of healthy controls and patients with Parkinson's disease.**

|                    | PD (n = 21)  | HC (n = 17)  | p-value |
|--------------------|--------------|--------------|---------|
| Age (y)            | 61.48 ± 8.87 | 58.35 ± 4.05 | 0.19    |
| Gender, male (%)   | 76.47        | 57.14        | 0.22    |
| BMI                | 24.87 ± 2.51 | 25.70 ± 2.05 | 0.33    |
| UPDRS III (n)      | 37.33 (3)    | –            | –       |
| Family history (%) | 19.05        | –            | –       |

BMI, body mass index; UPDRS III, part III of the Movement Disorders Society Unified Parkinson's Disease rating scale

**Table S2. Primers used for Real-time qPCR analysis**

| Gene symbol             | Forward primer               | Reverse primer                |
|-------------------------|------------------------------|-------------------------------|
| 12S rRNA<br>(1201-1394) | AGCCTGTTCTGTAATCGATAAACCC    | GCTATCGTAGTTTTCTGGGGTAGA      |
| 12S rRNA<br>(1379-1536) | AGAAAACACTACGATAGCCCTTATGAAA | TAGGGGTTTTAGTTAAATGTCCTTTG    |
| 16S rRNA<br>(1701-1784) | TACTACCAGACAACCTTAGCCAAAC    | TACTATATCTATTGCGCCAGGTTTC     |
| humanin                 | TTATGCCCCGCCTCTTCACGGGCA     | CACGAGGGTTCAGCTGTCTCTTACTTTTA |
| 16S rRNA<br>(2933-3131) | GGATAACAGCGCAATCCTATTC       | CTTTCGTACAGGGAGGAATTTG        |
| B2M                     | TGCTGTCTCCATGTTTGATGTATCT    | TCTCTGCTCCCCACCTCTAAGT        |
| NRF1                    | ACAGCAGTGGCAAGATCTCA         | GCAAGGCTGTAGTTGGTGCT          |
| PGC-1 $\alpha$          | CAGAGAACAGAAACAGCAGCA        | TGGGGTCAGAGGAAGAGATAAA        |
| ESRRA                   | GAGATCACCAAGCGGAGACG         | ATGAGACACCAGTGCATTAC          |
| SDHA                    | GAGATGTGGTGTCTCGGTCCAT       | GCTGTCTCTGAAATGCCAGGCA        |
| ATP5F1A                 | CATCTTGGTCCTGCCCTGAC         | GCTGCAGATAGACAAGGCGA          |
| ATP5F1D                 | GTCGTGGTGCATGCAGAG           | GAAGAGTCGGCGTTCACTG           |
| ACC2                    | CAAGTGCAAGATCTGTTTCCCTGATCG  | CCGGAAGTTTAGGGTTTTCTGAAGCAT   |
| ACLY                    | TGCTCGATTATGCACTGGAAGT       | ATGAACCCATACTCCTTCCCAG        |
| FASN                    | GGTCTTGAGAGATGGCTTGC         | AATTGGCAAAGCCGTAGTTG          |
| IDH3A                   | CCGCGTGGATCTCTAAGG           | AATTTCTGGCCAATACCATCTC        |
| MT-ND4                  | CTAGGCTCACTAAACATTCTA        | CCTAGTTTTAAGAGTACTGCG         |
| ATP5PB                  | CATCTTGGTCCTGCCCTGAC         | GCTGCAGATAGACAAGGCGA          |

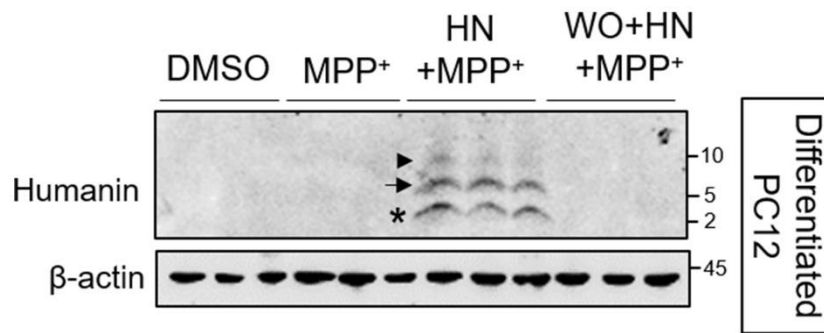

**Figure S1. Upregulation of intracellular humanin induced by humanin treatment is PI3K signaling-dependent.** Western blot analysis assessing the impact of PI3K inhibitor wortmannin on upregulation of intracellular humanin induced by HN treatment (10  $\mu$ M, 24 h) in MPP<sup>+</sup>-exposed differentiated PC12 cells. Pre-treatment with wortmannin (WO, 1  $\mu$ M) for 1 h significantly inhibited induction of intracellular humanin by its treatment. Asterisk, arrow, or arrowhead indicates the putative monomeric, dimeric, or trimeric form of humanin, respectively. HN: humanin.
